# Supplementary material
Source: Royal Society of Chemistry journal article supplement (doi:10.1039/d5ja00510h)
Supplement: d5ja00510h1.pdf [file d5ja00510h1.pdf]

## *Supplementary Information*

### **Simultaneous chemical separation of Ge and Sb from Sb-rich sulfide samples for isotopic analysis using MC-ICP-MS**

Mei Xiang <sup>a,b</sup>, Yu-Miao Meng <sup>b\*</sup>, Rui-Zhong Hu <sup>b,c</sup>, Xiao-Wen Huang <sup>b</sup>, Ting Zhou <sup>b</sup>, Liang Qi <sup>b</sup>, Shu-Xia Xu <sup>d</sup>, Jin-Yong Xu <sup>a</sup>

<sup>a</sup> *College of Earth and Planetary Sciences, Chengdu University of Technology, Chengdu 610059, China*

<sup>b</sup> *State Key Laboratory of Critical Mineral Research and Exploration, Institute of Geochemistry, Chinese Academy of Sciences, Guiyang 550081, China*

<sup>c</sup> *College of Earth and Planetary Sciences, University of Chinese Academy of Sciences, Beijing 100049, China*

<sup>d</sup> *College of Ecology and Environment, Chengdu University of Technology, Chengdu 610059, China*

This file includes:

Fig. S1 to S5

Table S1 to S4

---

\*Corresponding authors at: [mengyumiao@vip.gyig.ac.cn](mailto:mengyumiao@vip.gyig.ac.cn) (Yu-Miao Meng)

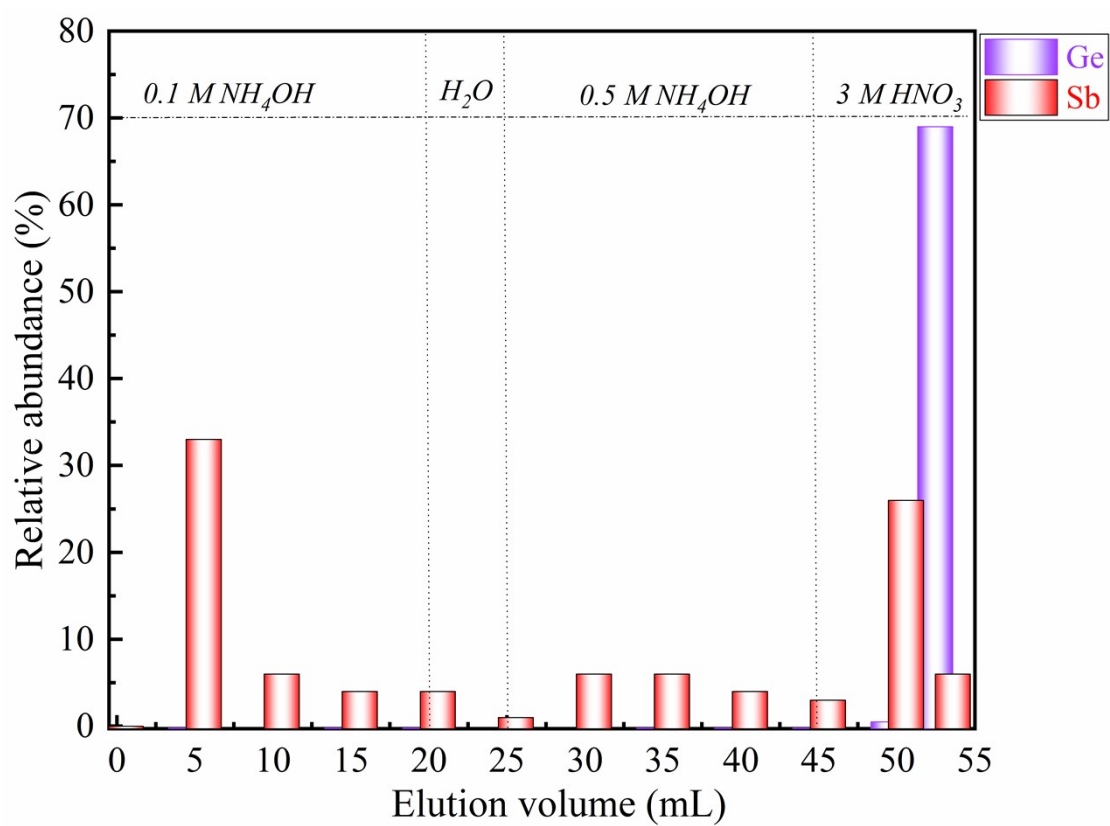

Fig. S1 Behavior of Ge and Sb on AG1-X8 resin under alkaline conditions. 2 mL of AG1-X8 resin and a synthetic solution of Ge and Sb were used in the experiment.

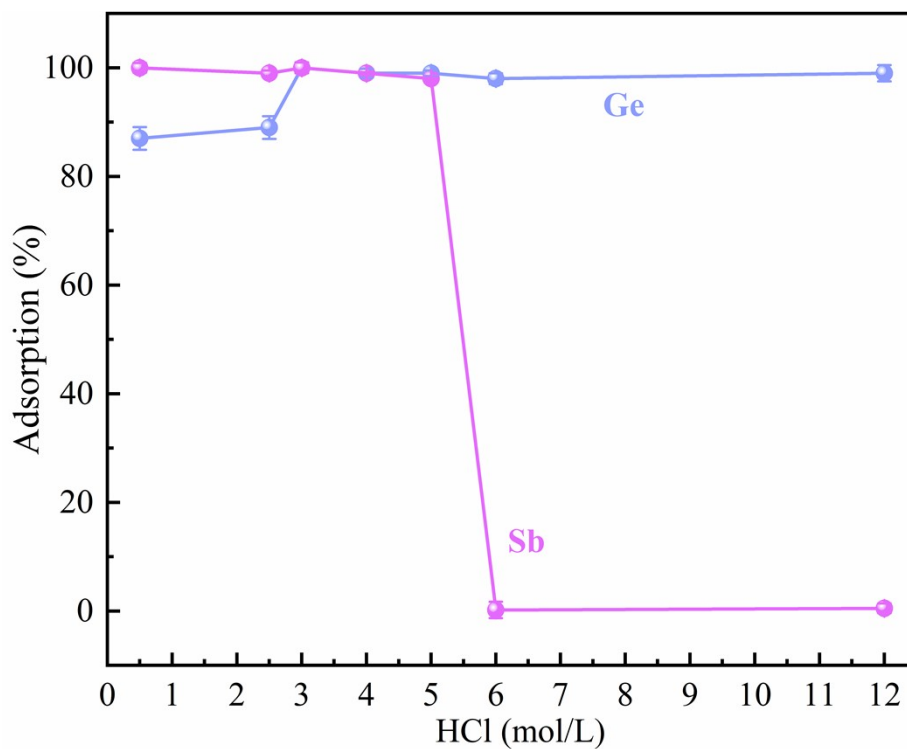

Fig. S2 The influence of HCl concentration on the adsorption of Ge and Sb on thiol silica resin. 8 mL of HCl with different concentrations were used in the experiment. Error bars indicate the standard deviation based on three independent experiments (n = 3).

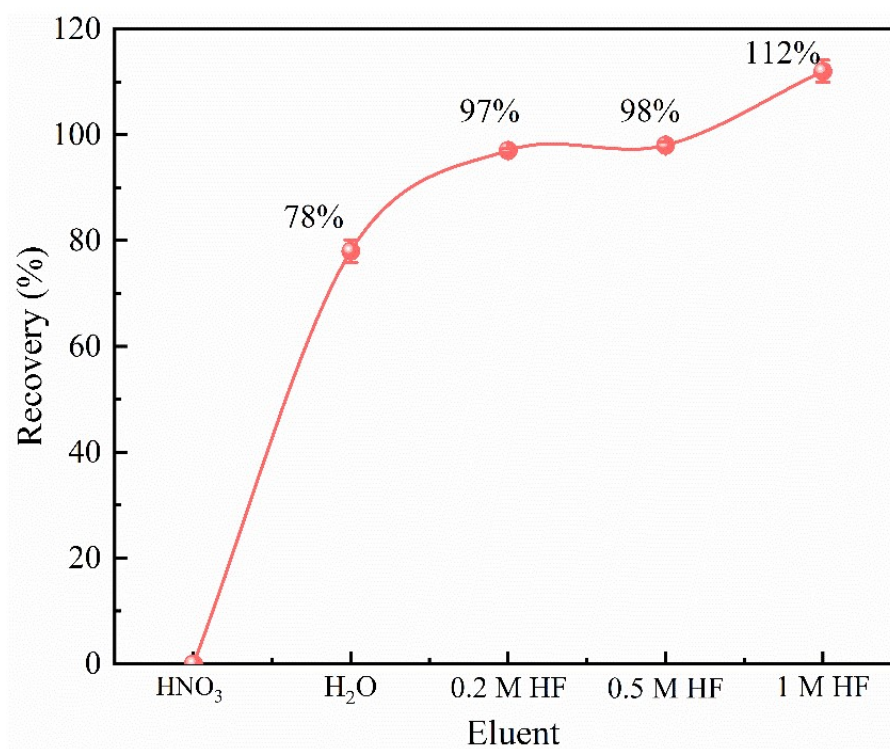

Fig. S3 The influence of different eluents on Ge recovery after elution with concentrated HNO<sub>3</sub>. Error bars indicate the standard deviation based on three independent experiments (n = 3).

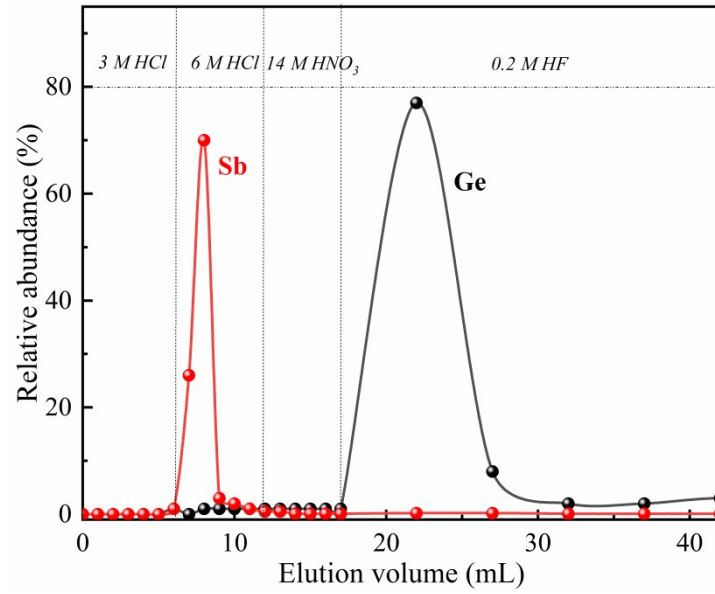

Fig. S4 The elution curves of Ge and Sb on thiol silica resin. The synthetic solution (Sb and Ge) was used to obtain the elution curve.

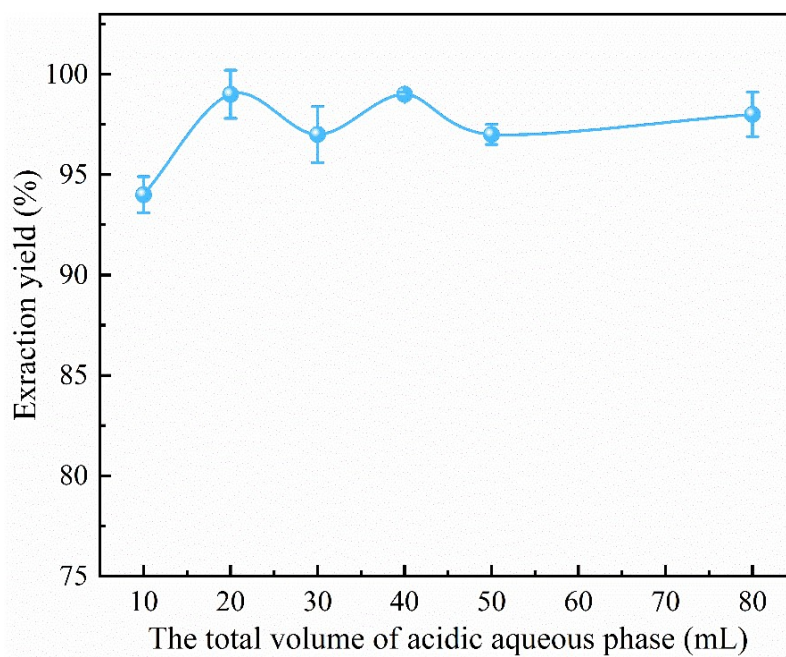

Fig. S5 Influence of the volume of acidic aqueous phases on the Ge extraction yield. Spex Ge was used as the sample for extraction, and the volume of chloroform used for single extraction was 10 mL. Error bars indicate the standard deviation based on three independent experiments ( $n = 3$ ).

Table S1 The elemental concentration of GBW07270 Chinese sulfide reference materials

| <b>Element</b> | <b>Certified Value</b> | <b>N</b> |
|----------------|------------------------|----------|
| Ag             | 5.0 ± 0.4              | 9        |
| As             | (3.3)                  |          |
| Bi             | 6.1 ± 1.2              | 9        |
| Cd             | 0.15* ± 0.01*          | 11       |
| Co             | 491 ± 23               | 12       |
| Cu             | 0.10* ± 0.01*          | 11       |
| Fe             | 2.14* ± 0.14*          | 12       |
| Ga             | 251 ± 18               | 7        |
| Ge             | 6.0 ± 0.7              | 7        |
| In             | 21.0 ± 1.4             | 6        |
| Mn             | 169 ± 8.0              | 11       |
| Ni             | 43.2 ± 4.0             | 8        |
| Pb             | 0.099* ± 0.013*        | 9        |
| S*             | 32.33 ± 0.17           | 7        |
| Sb             | 249 ± 56               | 8        |
| Se             | (3)                    |          |
| Sn             | (0.2)                  |          |
| Te             | (0.3)                  |          |
| Zn             | 62.51* ± 0.17*         | 7        |

Note: N represents number of sample; data marked with \* mean contents in percentage and unmarked data mean contents in ppm; () represents reference value; all errors are 1 s.

Table S2 MC-ICP-MS operating conditions

| <b>Settings</b>            | <b>Ge isotope</b> | <b>Sb isotope</b> |
|----------------------------|-------------------|-------------------|
| <b>MC-ICPMS parameters</b> |                   |                   |

| <b>Settings</b>                        | <b>Ge isotope</b>                                                                                                                                                              | <b>Sb isotope</b>                                                                                                                                                                                                                        |
|----------------------------------------|--------------------------------------------------------------------------------------------------------------------------------------------------------------------------------|------------------------------------------------------------------------------------------------------------------------------------------------------------------------------------------------------------------------------------------|
| RF power (W)                           | 1179                                                                                                                                                                           | 1300                                                                                                                                                                                                                                     |
| Coolant gas (L/min)                    | 15.1                                                                                                                                                                           | 16.5                                                                                                                                                                                                                                     |
| Auxiliary flow (Ar) (L/min)            | 0.7                                                                                                                                                                            | 0.85                                                                                                                                                                                                                                     |
| Cup configuration                      | L3 ( <sup>69</sup> Ga), L2 ( <sup>70</sup> Ge),<br>L1 ( <sup>71</sup> Ga), C ( <sup>72</sup> Ge),<br>H1 ( <sup>73</sup> Ge), H2 ( <sup>74</sup> Ge),<br>H3 ( <sup>76</sup> Ge) | H7 ( <sup>125</sup> Te), H6 ( <sup>123</sup> Sb), H5<br>( <sup>122</sup> Sn), H4 ( <sup>121</sup> Sb), H3<br>( <sup>120</sup> Sn), Ax ( <sup>117</sup> Sn), L2 ( <sup>115</sup> In),<br>L4 ( <sup>113</sup> In), L5 ( <sup>111</sup> Cd) |
| <b>Hydride generation</b>              |                                                                                                                                                                                |                                                                                                                                                                                                                                          |
| “Acid” reagent                         | 0.28 M HNO <sub>3</sub>                                                                                                                                                        |                                                                                                                                                                                                                                          |
| Reducing agent                         | 0.8% NaBH <sub>4</sub> +0.4% NaOH                                                                                                                                              |                                                                                                                                                                                                                                          |
| Reagents and sample flow rate (mL/min) | 0.25                                                                                                                                                                           |                                                                                                                                                                                                                                          |
| Additional gas flow rate               | 0.3                                                                                                                                                                            |                                                                                                                                                                                                                                          |
| <b>Membrane desolvator</b>             |                                                                                                                                                                                |                                                                                                                                                                                                                                          |
| Nebulization temperature               | 160°C                                                                                                                                                                          |                                                                                                                                                                                                                                          |
| Sweep gas (L/min)                      | 2.1                                                                                                                                                                            |                                                                                                                                                                                                                                          |
| Sample uptake rate (μL/ min)           | 100                                                                                                                                                                            |                                                                                                                                                                                                                                          |

Table S3 Germanium isotope results following thiol silica resin purification

| <b>Sample</b> | <b>Purification method</b> | <b><math>\delta^{74}\text{Ge}</math><br/>(‰, mean <math>\pm</math> 2SD)</b> | <b>References</b>              |
|---------------|----------------------------|-----------------------------------------------------------------------------|--------------------------------|
| Spex Ge       | /                          | -0.69 $\pm$ 0.10                                                            | Qi et al. (2019) <sup>10</sup> |

| <b>Sample</b> | <b>Purification method</b>      | <b><math>\delta^{74}\text{Ge}</math><br/>(‰, mean <math>\pm</math> 2SD)</b> | <b>References</b> |
|---------------|---------------------------------|-----------------------------------------------------------------------------|-------------------|
| Spex Ge       | Thiol silica resin purification | -0.32 $\pm$ 0.08                                                            | This study        |
| Spex Ge       | Unpurified                      | -0.66 $\pm$ 0.07                                                            | This study        |

Table S4 Average removal rates for the matrices and the residual element/Sb ratios in purified samples (GBW07270)

---

| <b>Element</b> | <b>Percentage removed (%)</b> | <b>Residual element/Sb ratio<br/>after purification</b> |
|----------------|-------------------------------|---------------------------------------------------------|
| Ag             | >99.99                        | <0.001                                                  |
| As             | >99.99                        | <0.001                                                  |
| Cd             | >99.99                        | <0.001                                                  |
| Co             | >99.99                        | <0.001                                                  |
| Cu             | >99.99                        | <0.001                                                  |
| Fe             | >99.99                        | <0.001                                                  |
| Ga             | >99.99                        | <0.001                                                  |
| Ge             | >99.99                        | <0.001                                                  |
| In             | >99.99                        | <0.001                                                  |
| Se             | >99.99                        | <0.001                                                  |
| Sn             | >99.99                        | <0.001                                                  |
| Te             | >99.99                        | <0.001                                                  |
| Zn             | >99.99                        | <0.001                                                  |
| Mn             | >99.99                        | <0.001                                                  |
| Ni             | >99.99                        | <0.001                                                  |
| Pb             | >99.99                        | <0.001                                                  |

---
